# Supplementary material
Source: Springer Nature journal article supplement (https://www.springermedizin.de/resource/supplementary/12958_2013_1117_MOESM3_ESM.pdf/9566852)

**Anti-sense****Anti-sense****Sense****AM**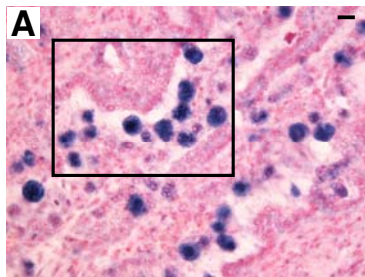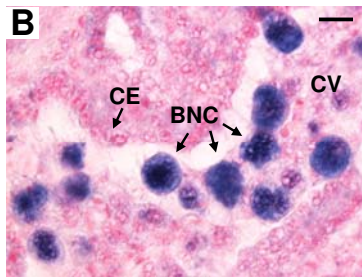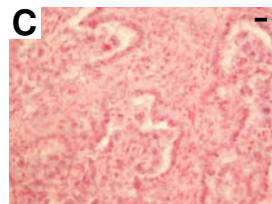**CRLR**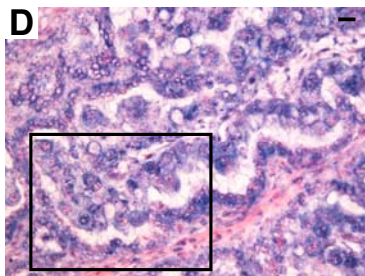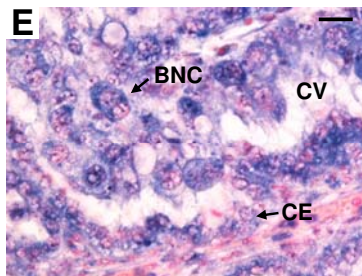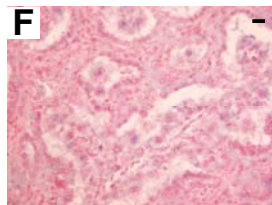**RAMP2**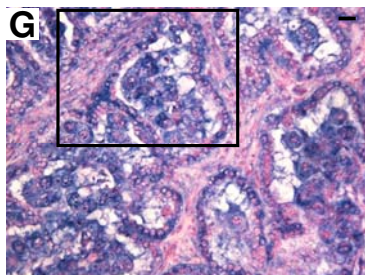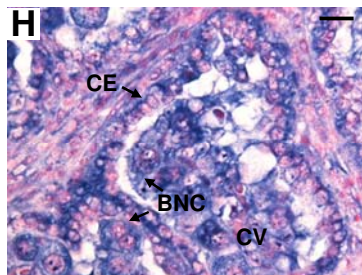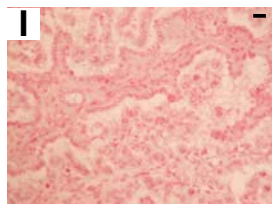**RAMP3**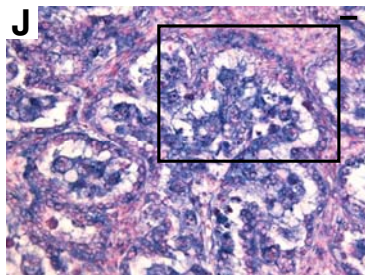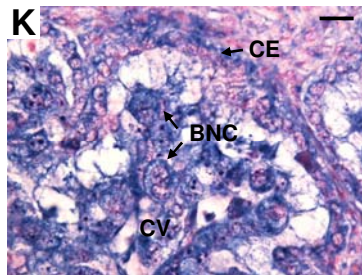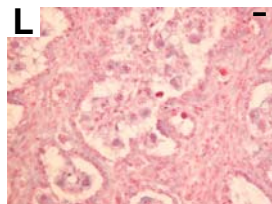

Supplement: MOESM3 [file 9566852]
